# Supplementary material
Source: PubMed Central journal article supplement (PMC3108803)
Supplement: supp_mcr035_mcr035supp.pdf [file supp_mcr035_mcr035supp.pdf]

## SUPPLEMENTARY DATA

TABLE S1. Tissue samples of *Clianthus maximus* 'Kaka King'<sup>®</sup> for RNA isolation

| Sample types                                  | Sample description                                     | Sampling date |
|-----------------------------------------------|--------------------------------------------------------|---------------|
| Vegetative tissue +/- reproductive structures | Shoot tips with/without inflorescence primordia        | 8/11/2002     |
|                                               | Shoot tips with/without inflorescence primordia        | 8/01/2003     |
|                                               | Shoot tips with/without inflorescence primordia        | 24/02/2003    |
|                                               | Shoot tips with/without inflorescence primordia        | 4/04/2003     |
|                                               | Shoot tips without inflorescence primordia             | 1/05/2003     |
|                                               | Shoot tips with inflorescence primordia                | 1/05/2003     |
|                                               | Fully expanded leaves                                  | 16/05/2003    |
|                                               | Shoot tips with/without inflorescence primordia        | 4/07/2003     |
|                                               | Shoot tips with/without inflorescence primordia        | 17/09/2003    |
| Reproductive structures                       | Inflorescences (1–2 mm)                                | 1/05/2003     |
|                                               | Inflorescences (15–20 mm)                              | 28/01/2003    |
|                                               | Inflorescences (15–20 mm)                              | 24/02/2003    |
|                                               | Inflorescences (15–20 mm)                              | 4/04/2003     |
|                                               | Inflorescences (15–20 mm)                              | 30/04/2003    |
|                                               | Inflorescences (15–20 mm)                              | 11/06/2003    |
|                                               | Inflorescences (25–35 mm) with flower buds around 1 mm | 11/06/2003    |
|                                               | Flower buds (2–3 mm)                                   | 11/06/2003    |
|                                               | Flower buds (2–3 mm)                                   | 24/07/2003    |
|                                               | Flower buds (5–7 mm)                                   | 11/06/2003    |
|                                               | Flower buds (10–12 mm) showing petal tip               | 15/08/2003    |
|                                               | Flower buds (10–12 mm) showing petal tip               | 26/09/2003    |
|                                               | Sepals from flower buds showing petal tip              | 26/09/2003    |
|                                               | Petals from flower buds showing petal tip              | 26/09/2003    |
|                                               | Stamens from flower buds showing petal tip             | 26/09/2003    |
|                                               | Carpels from flower buds showing petal tip             | 26/09/2003    |
|                                               | Mature flower buds before open                         | 18/09/2003    |
|                                               | Mature flower buds before open                         | 26/09/2003    |
|                                               | Fully opened flowers before senescence                 | 26/09/2003    |
|                                               | Young seed pods 2 weeks after flower senescence        | 7/10/2003     |

TABLE S2. Floral identity gene homologues used for multiple alignment and phylogenetic analysis

| Homologues                                                                | Gene names                                                                             | Species                                  | Accession No.            |
|---------------------------------------------------------------------------|----------------------------------------------------------------------------------------|------------------------------------------|--------------------------|
| <i>LFY/FLO</i>                                                            | <i>CmLFY</i>                                                                           | <i>Clianthus maximus</i>                 | DQ418756                 |
|                                                                           | <i>LEAFY</i>                                                                           | <i>Arabidopsis thaliana</i>              | NM125579                 |
|                                                                           | <i>FLO</i>                                                                             | <i>Antirrhinum majus</i>                 | AAA62574                 |
|                                                                           | <i>UNIFOLIATA (UNI)</i>                                                                | <i>Pisum sativum</i>                     | AAB88139                 |
|                                                                           | <i>LcLFY</i>                                                                           | <i>Lotus corniculatus var. japonicus</i> | AAX13294                 |
|                                                                           | <i>MtUNI</i>                                                                           | <i>Medicago truncatula</i>               | AY928184                 |
|                                                                           | <i>StLFY</i>                                                                           | <i>Sophora tetraptera</i>                | DQ418760                 |
|                                                                           | <i>BoLFY</i>                                                                           | <i>Brassica oleracea</i>                 | Q05536                   |
|                                                                           | <i>NFL2</i>                                                                            | <i>Nicotiana tabacum</i>                 | AAC48986                 |
|                                                                           | <i>PtLF</i>                                                                            | <i>Populus trichocarpa</i>               | AAB51533                 |
|                                                                           | <i>VvLFY</i>                                                                           | <i>Vitis vinifera</i>                    | AAM46141                 |
|                                                                           | <i>ZFL1</i>                                                                            | <i>Zea mays</i>                          | AAO43175                 |
|                                                                           | <i>NEEDLY</i>                                                                          | <i>Pinus radiata</i>                     | AAB68601                 |
|                                                                           | A class<br>MADS-box<br>genes<br><br>( <i>API/SQUA</i> ,<br><i>CAL</i> , <i>euFUL</i> ) | <i>CmAPI</i>                             | <i>Clianthus maximus</i> |
| <i>API</i>                                                                |                                                                                        | <i>Arabidopsis thaliana</i>              | Z16421                   |
| <i>CAL</i>                                                                |                                                                                        | <i>Arabidopsis thaliana</i>              | NM102395                 |
| <i>SQUA</i>                                                               |                                                                                        | <i>Antirrhinum majus</i>                 | CAA45228                 |
| <i>PEAM4</i>                                                              |                                                                                        | <i>Pisum sativum</i>                     | AJ291298                 |
| <i>MtPIM</i>                                                              |                                                                                        | <i>Medicago truncatula</i>               | DQ139345                 |
| <i>StAPI</i>                                                              |                                                                                        | <i>Sophora tetraptera</i>                | DQ418761                 |
| <i>LcAPIa</i>                                                             |                                                                                        | <i>Lotus corniculatus var. japonicus</i> | AY770395                 |
| <i>LcAPIb</i>                                                             |                                                                                        | <i>Lotus corniculatus var. japonicus</i> | AY770396                 |
| <i>MdAPI</i>                                                              |                                                                                        | <i>Malus x domestica</i>                 | AY071921                 |
| <i>MdCAL</i>                                                              |                                                                                        | <i>Malus x domestica</i>                 | GU983665                 |
| <i>PtAPI-1</i>                                                            |                                                                                        | <i>Populus trichocarpa</i>               | AAT39554                 |
| <i>FRUITFULL</i>                                                          |                                                                                        | <i>Antirrhinum majus</i>                 | AY306139                 |
| <i>NAPI</i>                                                               |                                                                                        | <i>Nicotiana tabacum</i>                 | AAD01421                 |
| <i>EAPI</i>                                                               |                                                                                        | <i>Eucalyptus globulus</i>               | AAG24909                 |
| <i>MdMADS2</i>                                                            |                                                                                        | <i>Malus x domestica</i>                 | U78948                   |
| <i>PsFUL</i>                                                              |                                                                                        | <i>Pisum sativum</i>                     | AY884287                 |
| <i>AGL8</i>                                                               |                                                                                        | <i>Arabidopsis thaliana</i>              | NM125484                 |
| <i>LpMADS1</i>                                                            | <i>Lolium perenne</i>                                                                  | AY198326                                 |                          |
| <i>PrMADS2</i>                                                            | <i>Pinus radiata</i>                                                                   | AAD09207                                 |                          |
| B class<br>MADS-box<br>genes<br><br>( <i>PI/GLO</i> ,<br><i>AP3/DEF</i> ) | <i>CmPI</i>                                                                            | <i>Clianthus maximus</i>                 | DQ418758                 |
|                                                                           | <i>PI</i>                                                                              | <i>Arabidopsis thaliana</i>              | D30807                   |
|                                                                           | <i>GLO</i>                                                                             | <i>Antirrhinum majus</i>                 | X68831                   |
|                                                                           | <i>PEAM1</i>                                                                           | <i>Pisum sativum</i>                     | AAW29099                 |
|                                                                           | <i>MtPI</i>                                                                            | <i>Medicago truncatula</i>               | FJ403468                 |
|                                                                           | <i>StPI</i>                                                                            | <i>Sophora tetraptera</i>                | DQ418762                 |
|                                                                           | <i>LcPIa</i>                                                                           | <i>Lotus corniculatus var. japonicus</i> | AY770398                 |
|                                                                           | <i>LcPIb</i>                                                                           | <i>Lotus corniculatus var. japonicus</i> | AY770399                 |
|                                                                           | <i>VvPI</i>                                                                            | <i>Vitis vinifera</i>                    | DQ059750                 |
|                                                                           | <i>FBPI</i>                                                                            | <i>Petunia hybrida</i>                   | Q03488                   |
|                                                                           | <i>OsPI</i>                                                                            | <i>Oryza sativa</i>                      | L37527                   |
|                                                                           | <i>GmNMH7</i>                                                                          | <i>Glycine max</i>                       | AY310303                 |
|                                                                           | <i>LcAP3</i>                                                                           | <i>Lotus corniculatus var. japonicus</i> | AY770400                 |
|                                                                           | <i>DEF</i>                                                                             | <i>Antirrhinum majus</i>                 | X62810                   |
|                                                                           | <i>VvAP3</i>                                                                           | <i>Vitis vinifera</i>                    | EF418603                 |
|                                                                           | <i>AP3</i>                                                                             | <i>Arabidopsis thaliana</i>              | NM115294                 |
|                                                                           | <i>PrDGL</i>                                                                           | <i>Pinus radiata</i>                     | AF120097                 |

|                      |                        |                                                 |                      |
|----------------------|------------------------|-------------------------------------------------|----------------------|
|                      | <i>CmAG</i>            | <i>Clanthus maximus</i>                         | DQ418759             |
| C class              | <i>AG</i>              | <i>Arabidopsis thaliana</i>                     | X53579               |
| MADS-box             | <i>StAG</i>            | <i>Sophora tetraptera</i>                       | DQ418763             |
| genes                | <i>PsM7</i>            | <i>Pisum sativum</i>                            | AY884291             |
| (AG/FAR,<br>PLE/SHP) | <i>LcAGa</i>           | <i>Lotus corniculatus</i> var. <i>japonicus</i> | AY770402             |
|                      | <i>LcAGb</i>           | <i>Lotus corniculatus</i> var. <i>japonicus</i> | AY770403             |
|                      | <i>NAG1</i>            | <i>Nicotiana tabacum</i>                        | Q43585               |
|                      | <i>VvAG</i>            | <i>Vitis vinifera</i>                           | GU133631             |
|                      | <i>PtAG1</i>           | <i>Populus trichocarpa</i>                      | AF052570             |
|                      | <i>PtAG2</i>           | <i>Populus trichocarpa</i>                      | AF052571             |
|                      | <i>BnAG</i>            | <i>Brassica napus</i>                           | Q01540               |
|                      | <i>FARINELLI (FAR)</i> | <i>Antirrhinum majus</i>                        | AB516405             |
|                      | <i>PLENA (PLE)</i>     | <i>Antirrhinum majus</i>                        | S53900               |
|                      | <i>PsM8</i>            | <i>Pisum sativum</i>                            | AY884292             |
|                      | <i>LcAGL1</i>          | <i>Lotus corniculatus</i> var. <i>japonicus</i> | AY770404             |
|                      | <i>SHP1</i>            | <i>Arabidopsis thaliana</i>                     | AY727644             |
|                      | <i>SHP2</i>            | <i>Arabidopsis thaliana</i>                     | AY727669             |
|                      | <i>OsMADS3</i>         | <i>Oryza sativa</i>                             | FJ750940             |
|                      | <i>ZAG1</i>            | <i>Zea mays</i>                                 | NM001111851          |
|                      | <i>ZAG2</i>            | <i>Zea mays</i>                                 | NM001111908          |
|                      |                        | <i>PrMADS9</i>                                  | <i>Pinus radiata</i> |

TABLE S3. Real-time PCR primers for expression analysis of floral identity genes and housekeeping genes in *Clianthus*

| Genes                           | Primer sequences (5' to 3') |                                 |
|---------------------------------|-----------------------------|---------------------------------|
| <i>LEAFY</i>                    | Forward                     | ACG ATC AAT GCC GTG AGT TC      |
|                                 | Reverse                     | TCT AAC TGC TGC TCC AGA CTT TG  |
| <i>APETALA1</i>                 | Forward                     | ATG CTG AGG TTG CTT TGA TTG     |
|                                 | Reverse                     | TCT AAC TGC TGT TCC AGA CTT TG  |
| <i>PISTALLATA</i>               | Forward                     | AGA ACA CAA GCA ACA GGC AAG T   |
|                                 | Reverse                     | GTG CCT GAG CTC AAT TTG CAT     |
| <i>AGAMOUS</i>                  | Forward                     | TGG TCG CCT CTA TGA ATA TGC TA  |
|                                 | Reverse                     | GTT TGT CTG CTT CTT GCT GGT AA  |
| <i><math>\beta</math>-Actin</i> | Forward                     | GAG CTA TGA GCT GCC TGA TGG ACA |
|                                 | Reverse                     | GTA ATC TCC TTG CTC ATC CTA TCA |
| <i>GAPDH</i>                    | Forward                     | ATG ACA GRT TTG GMA TTG TTG A   |
|                                 | Reverse                     | TGC CCT CAG AYT CYT CCT TGA     |
| <i>18S rRNA</i>                 | Forward                     | TAC CGT CCT AGT CTC AAC CAT AA  |
|                                 | Reverse                     | AGA ACA TCT AAG GGC ATC ACA     |

FIG. S1. Comparison of amino acid sequences of CmLFY with representative FLO/LFY-like proteins

|        |       |                                                |                |                |
|--------|-------|------------------------------------------------|----------------|----------------|
|        |       | 301                                            |                | 360            |
| CmLFY  | (1)   | -----PGEVARGKKNGLDYLFHLYDQCREFLIQVQTIAKDRGEKCP | TKVTNQVFR      |                |
| LcLFY  | (233) | QREHPFIVTEPGEVARGKKNGLDYLFHLYEQCREFLIQVQAI     | TAKDRGEKCP     | TKVTNQVFR      |
| UNI    | (223) | QREHPFIVTEPAEVARGKKNGLDYLFHLYEQCREFLIQVQAI     | TAKERGEKCP     | TKVTNQVFR      |
| MtUNI  | (220) | QREHPFIVTEPGEVARGKKNGLDYLFHLYEQCREFLIQVQAI     | TAKERGEKCP     | TKVTNQVFR      |
| GmFLY  | (235) | QREHPFIVTEPGEVARGKKNGLDYLFHLYEQCREFLIQVQAI     | TAKDRGEKCP     | TKVTNQVFR      |
| PTLF   | (205) | QREHPFIVTEPGEVARGKKNGLDYLFHLYEQCRD             | FLIQVQSI       | TAKERGEKCP     |
| NFL2   | (237) | QREHPFIVTEPGEVARGKKNGLDYLFHLYEQCRD             | FLIQVQNI       | TAKERGEKCP     |
| FLO    | (220) | QREHPFIVTEPGEVARGKKNGLDYLFHLYEQCRD             | FLIQVQTI       | TAKERGEKCP     |
| LFY    | (232) | QREHPFIVTEPGEVARGKKNGLDYLFHLYEQCREFLIQVQTI     | TAKDRGEKCP     | TKVTNQVFR      |
| BoLFY  | (233) | QREHPFIVTEPGEVARGKKNGLDYLFHLYEQCREFLIQVQTI     | TAKDRGEKCP     | TKVTNQVFR      |
| ZFL1   | (220) | QREHPFVTEPGEVARAKKNGLDYLFHLYEQCRV              | FLIQVQSI       | TAKLGGHKS      |
| NEEDLY | (245) | PREHPFIVTEPGELARGKKNGLDYLFHLYEQCGK             | FLLEVQRI       | TAKERGEKCP     |
|        |       | 361                                            |                | 420            |
| CmLFY  | (51)  | YAKKAGASYINKPKMRHYVHCYALHCLDEEASNE             | LRAFKERGENV    | GAWRQACYKPLVAI |
| LcLFY  | (293) | YAKKAGASYINKPKMRHYVHCYALHCLDEEVSNE             | LRRGFKERGENV   | GAWRQACYKPLVAI |
| UNI    | (283) | YAKKAGASYINKPKMRHYVHCYALHCLDEEVSNE             | LRRGFKERGENV   | GAWRQACYKPLVAI |
| MtUNI  | (280) | YAKKAGASYINKPKMRHYVHCYALHCLDEEVSNE             | LRRGFKERGENV   | GAWRQACYKPLVAI |
| GmFLY  | (295) | YAKKAGASYINKPKMRHYVHCYALHCLDEEVSNE             | LRAFKERGENV    | GAWRQACYKPLVAI |
| PTLF   | (265) | YAKKAGASYINKPKMRHYVHCYALHCLDEEDASNA            | LRAFKERGENV    | GAWRQACYKPLVAI |
| NFL2   | (297) | YAKKAGASYINKPKMRHYVHCYALHCLDEEASNA             | LRAFKERGENV    | GAWRQACYKPLVAI |
| FLO    | (280) | YAKKAGANYINKPKMRHYVHCYALHCLDEEASNA             | LRAFKERGENV    | GAWRQACYKPLVAI |
| LFY    | (292) | YAKKSASYINKPKMRHYVHCYALHCLDEEASNA              | LRAFKERGENV    | GSWRQACYKPLVNI |
| BoLFY  | (293) | YAKKSAGANYINKPKMRHYVHCYALHCLDEEASNA            | LRSFKVRGENV    | GSWRQACYKPLVDI |
| ZFL1   | (280) | YANKCASYINKPKMRHYVHCYALHCLDEEASNA              | LRRAYKSRGENV   | GAWRQACYAPLVEI |
| NEEDLY | (305) | HAKHNNAVYINKPKMRHYVHCYALHCLDSEQSNH             | LRLRYKERGENV   | GAWRQACYYPLVAI |
|        |       | 421                                            |                | 480            |
| CmLFY  | (111) | AARQGWDI                                       | DAIFNAHPRLSIWY | -----          |
| LcLFY  | (353) | AARQGWDI                                       | DAIFNAHPRLSIWY | VPTKLRQLCHAERN |
| UNI    | (343) | AARQGWDI                                       | DAIFNAHPRLSIWY | GPTKLRQLCHAERN |
| MtUNI  | (340) | AARQGWDI                                       | DAIFNAHPRLSIWY | VPTKLRQLCHAERN |
| GmFLY  | (355) | AARQGWDI                                       | DAIFNAHPRLSIWY | VPTKLRQLCHAERN |
| PTLF   | (325) | ASRQGWDI                                       | DSIFNAHPRLAIWY | VPTKLRQLCYAERN |
| NFL2   | (357) | AARQGWDI                                       | DTIFNAHPRLAIWY | VPTKLRQLCHSERS |
| FLO    | (340) | AARQGWDI                                       | DTIFNAHPRLSIWY | VPTKLRQLCHAERS |
| LFY    | (352) | ACRHGWDI                                       | DAVFNHPRLSIWY  | VPTKLRQLCHLER  |
| BoLFY  | (353) | ACRHGWDI                                       | DAVFNHPRLSIWY  | VPTKLRQLCHLER  |
| ZFL1   | (340) | AARHGF                                         | DI             | DAVFAAHPRLAVWY |
| NEEDLY | (365) | ARENW                                          | DI             | EGIFNRNEKLIWY  |

Identical and conserved amino acids are shaded. Sequence segments not covered by the CmLFY fragments were not included. ▼ intron/exon split site. E2 and E3: exon 2 and exon 3. Corresponding species names are listed in Table S2.

FIG. S2.. Neighbor-joining phylogenetic tree of representative FLO/LFY orthologues generated with 1000 bootstrap replicates

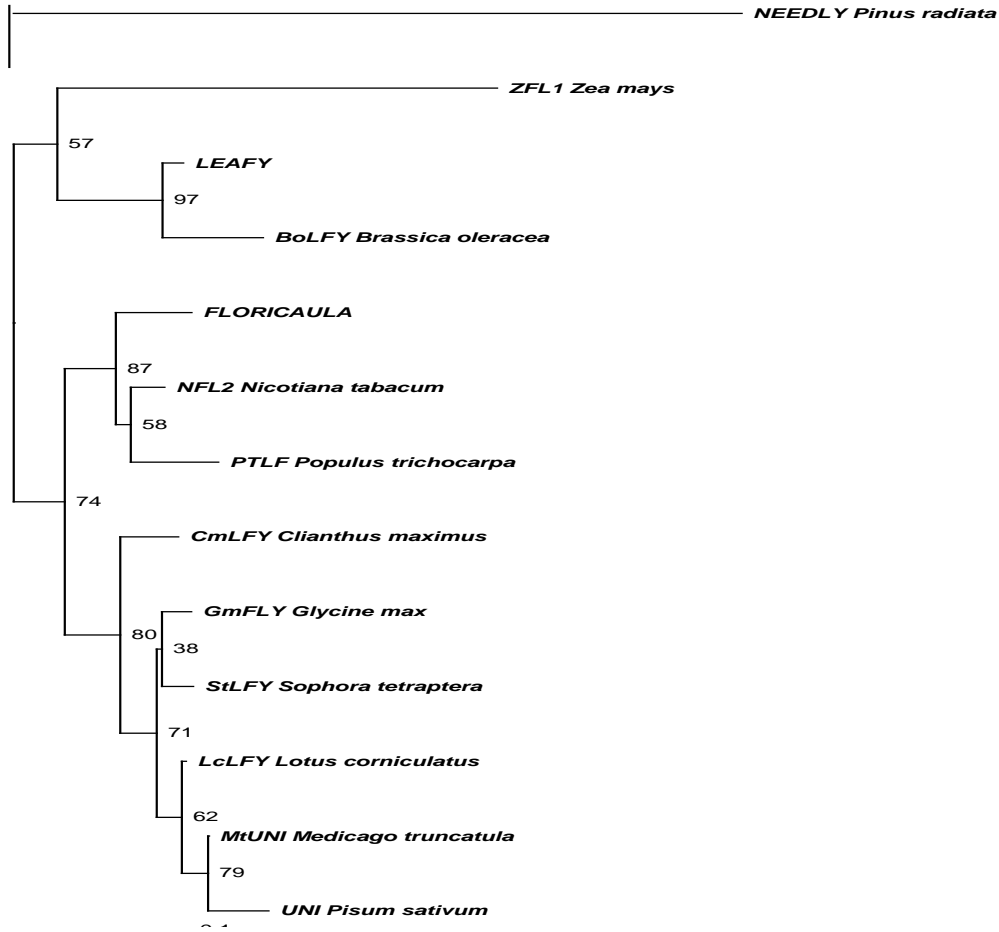

Species names and NCBI accession numbers are listed in Table S2.

FIG. S3. Deduced gene structure of *CmLFY*, *CmAPI*, *CmPI* and *CmAG* fragments in *C. maximus*

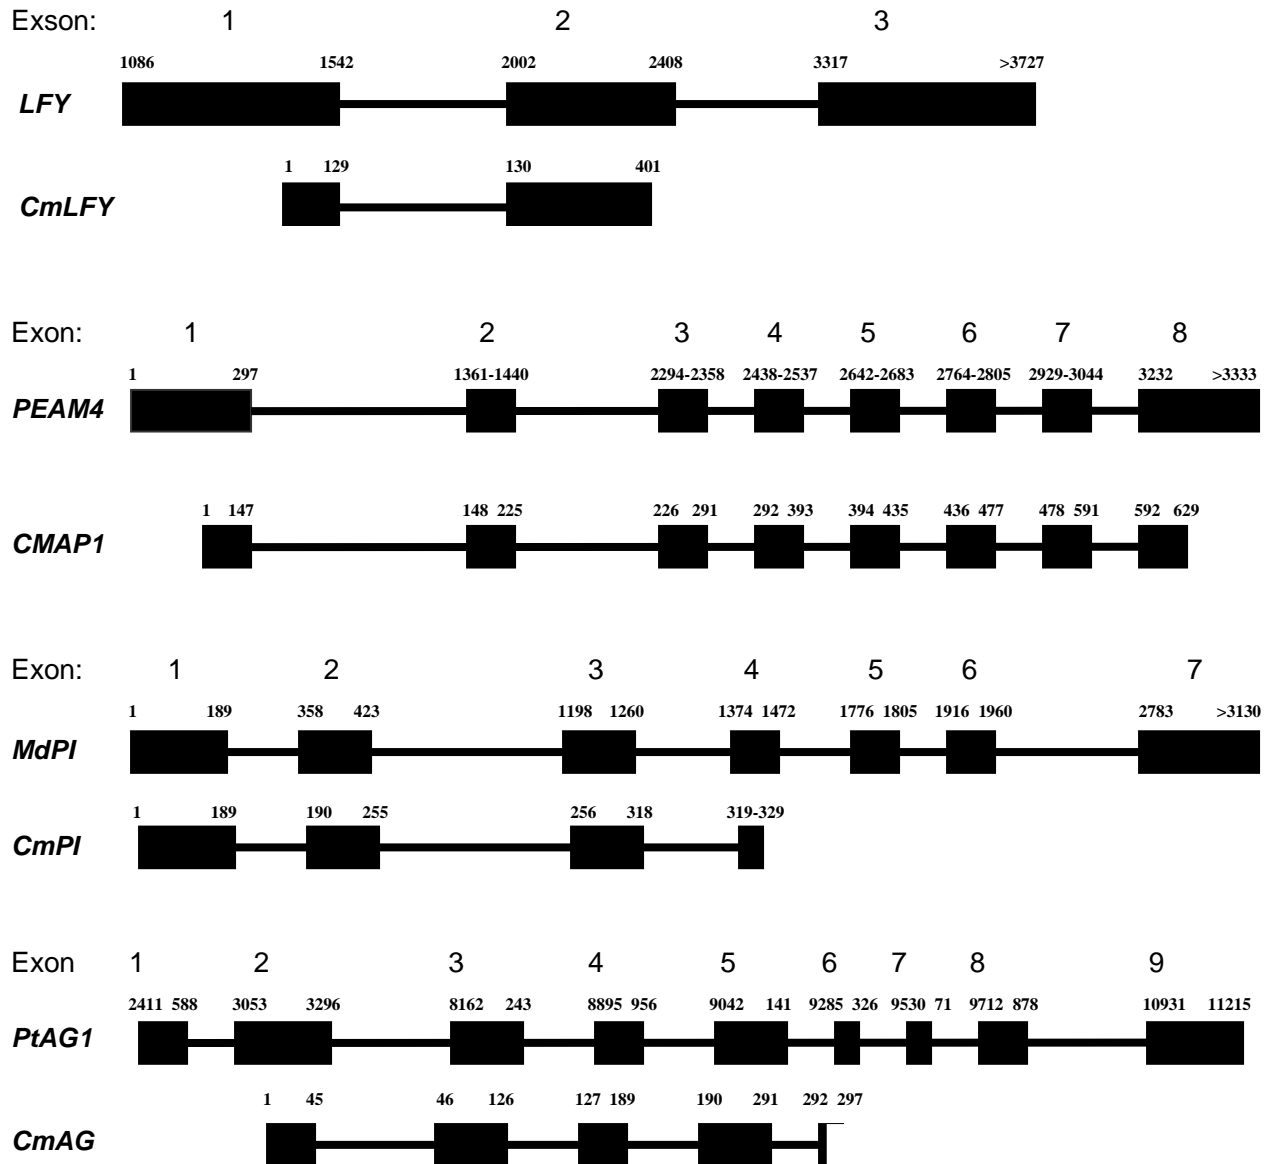

*LFY*: *Arabidopsis thaliana* *LEAFY* gene (AF466791); *PEAM4*: *Pisum sativum* *API* homologue (AJ291298); *MdPI*: *Malus domestica* *PI* homologue (AJ291491); *PTAG1*: *Populus trichocarpa* *AG* homologue (AF052570).

FIG. S4. Comparison of amino acid sequences of CmAP1 with representative class A MADS-box gene proteins

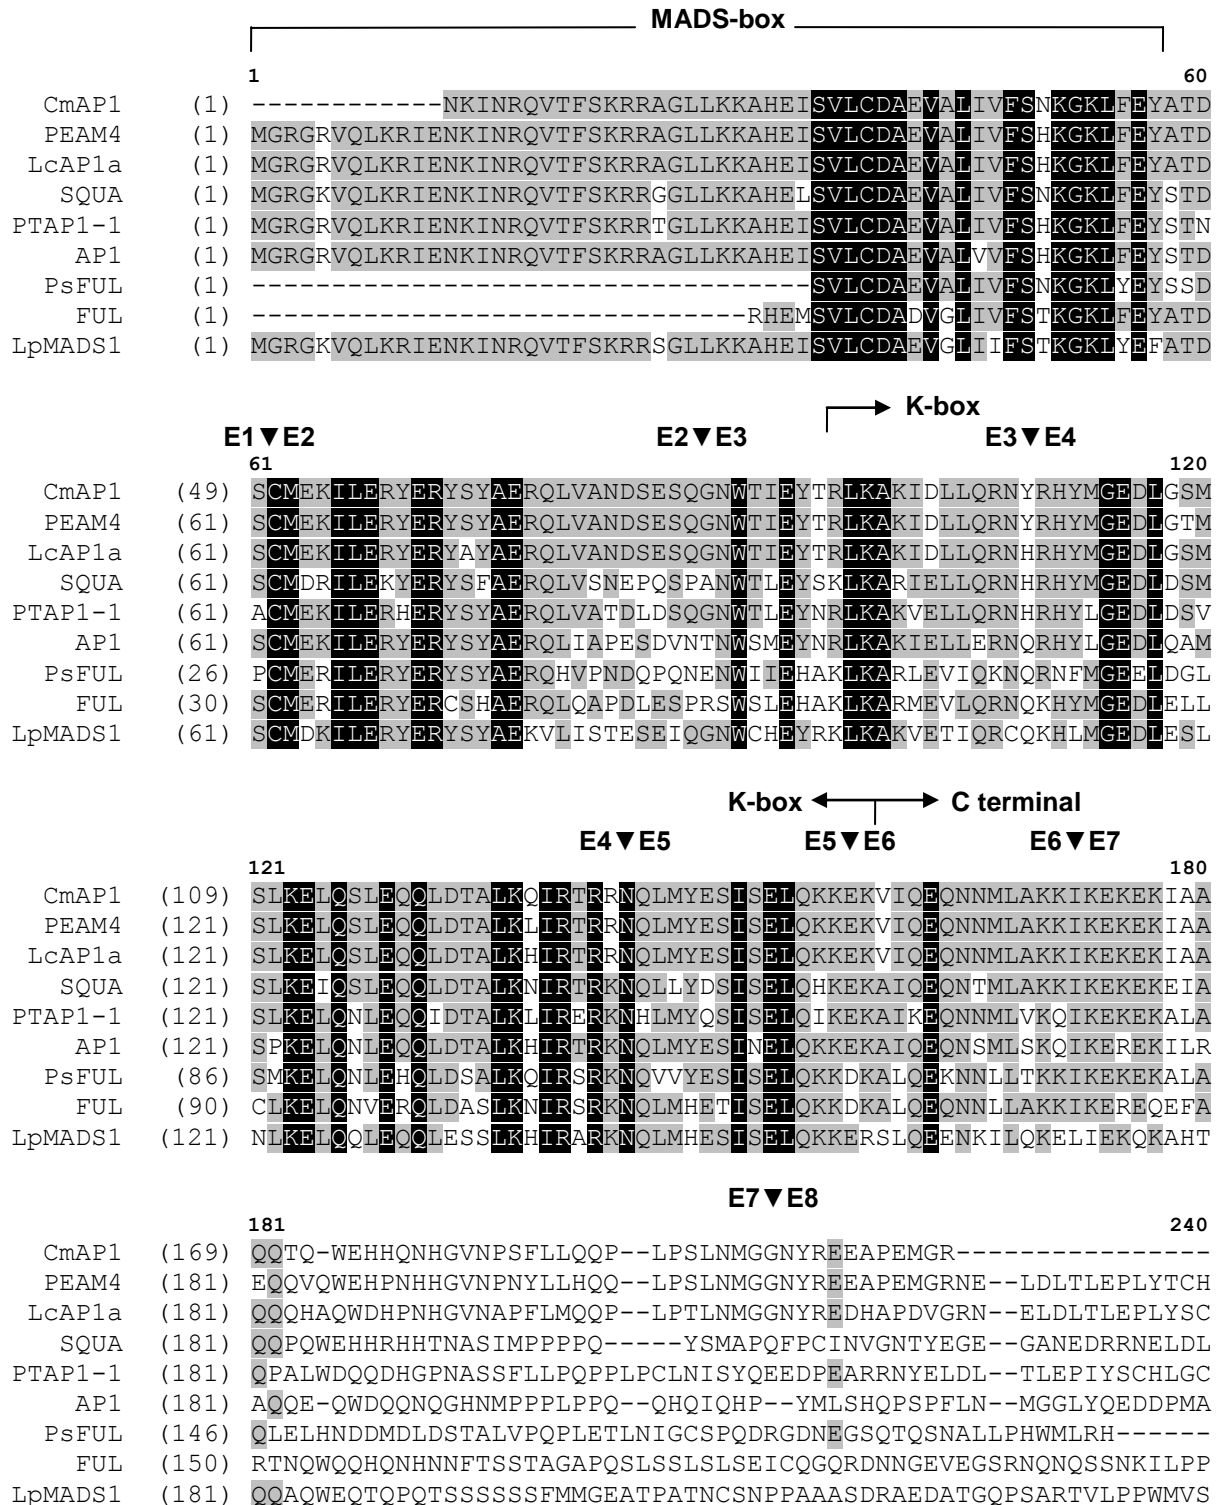

Identical and conserved amino acids were shaded. Sequence segments not covered by CmAP1 were not included.

▼ split sites of intron/exon. E1-E8: exon 1- 8. Corresponding species names are listed in Table S2.



FIG. S5. Neighbor-joining phylogenetic tree of representative representative class A MADS-box gene proteins generated with 1000 bootstrap replicates

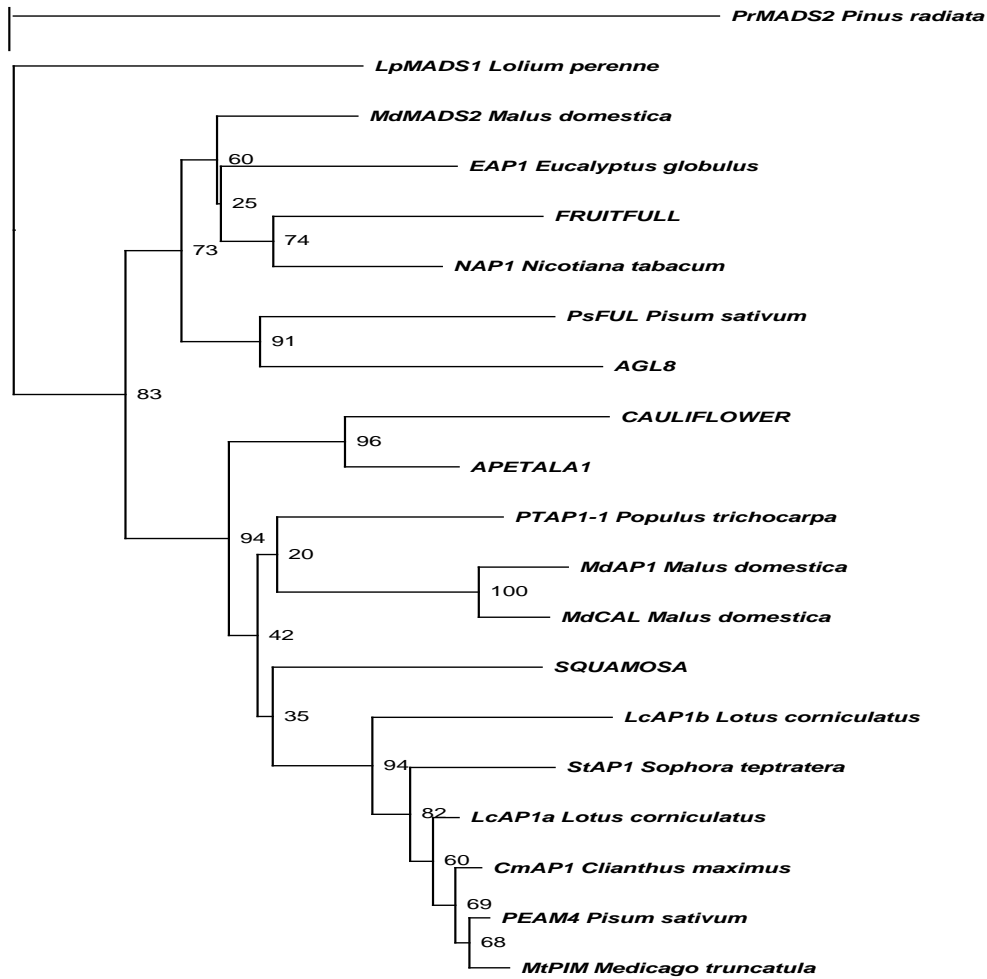

Species names and NCBI accession numbers are listed in Table S2.

FIG. S6. Comparison of amino acid sequences of CmPI with representative class B MADS-box gene proteins

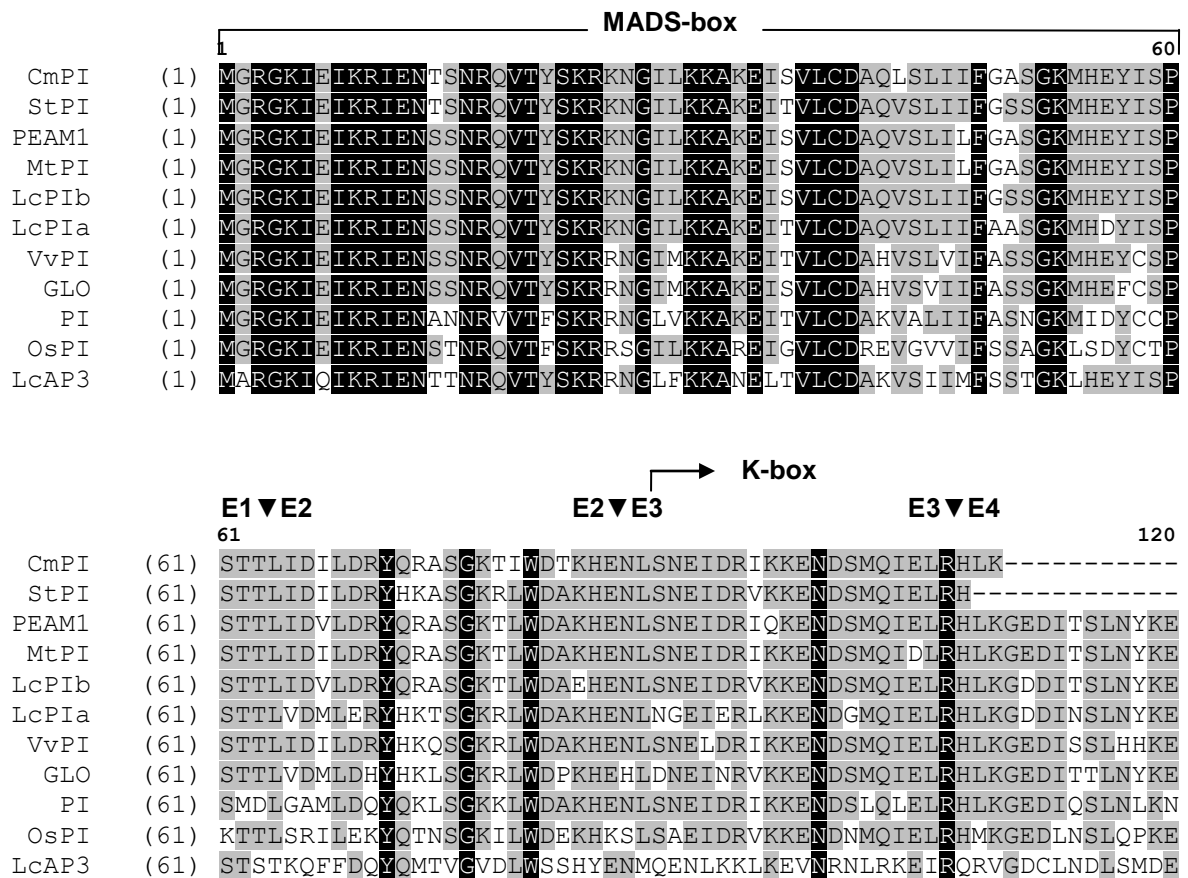

Identical and conserved amino acids were shaded. Sequence segments not covered by CmPI were not included.

▼ split sites of intron/exon. E1-E4: exon 1- 4. Corresponding species names are listed in Table S2.

FIG. S7. Neighbor-joining phylogenetic tree of representative representative class B MADS-box gene proteins generated with 1000 bootstrap replicates.

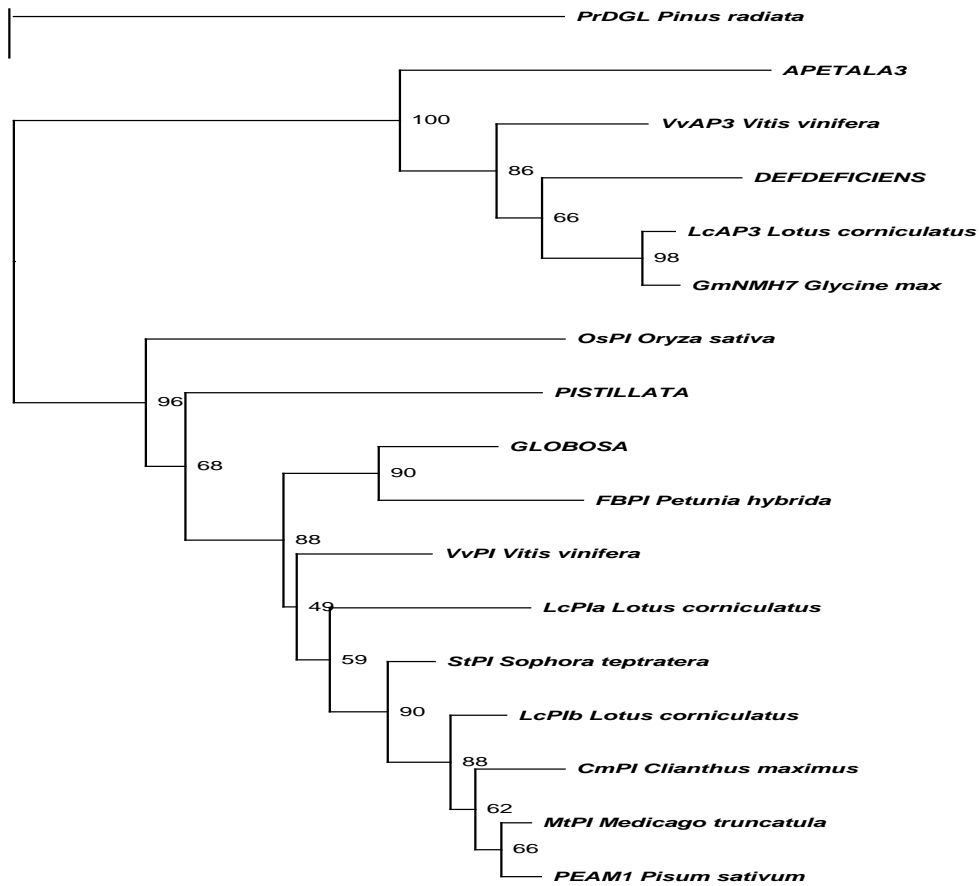

Species names and NCBI accession numbers are listed in Table S2.

FIG. S8. Comparison of amino acid sequences of CmAG with representative class C MADS-box gene proteins

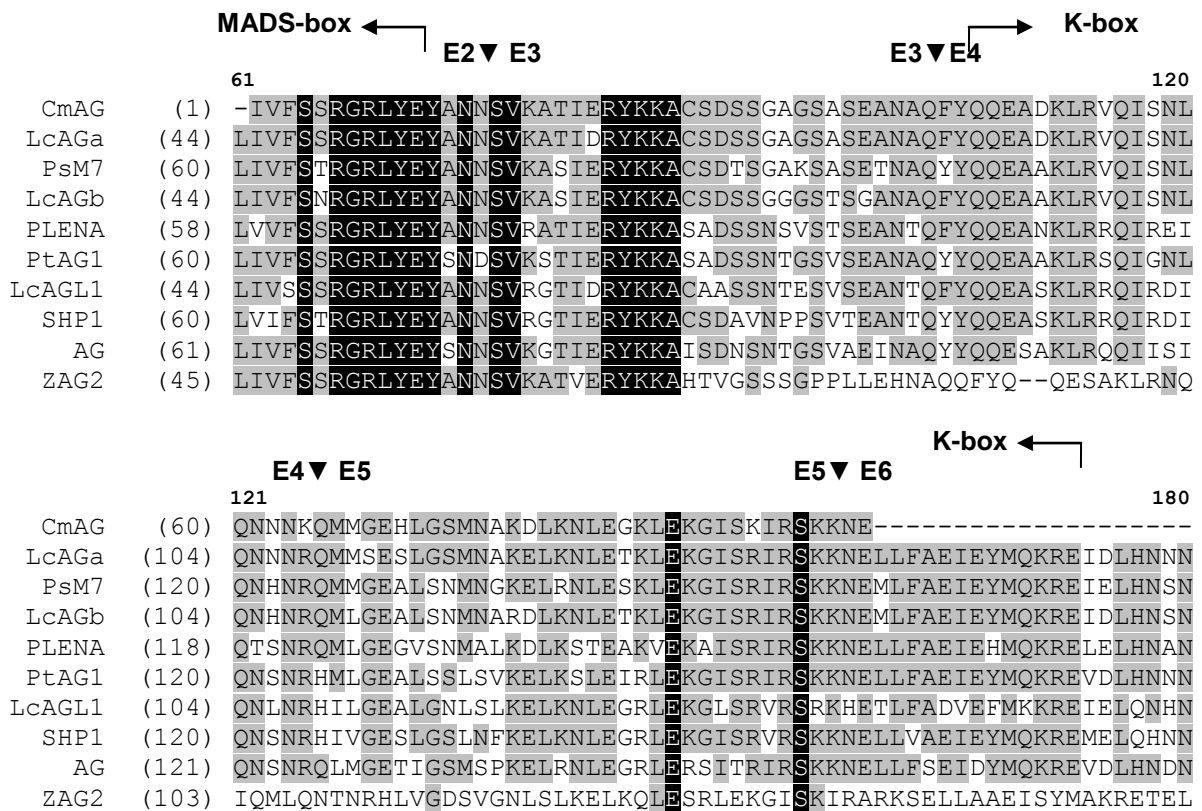

Identical and conserved amino acids were shaded. Sequence segments not covered by CmAG were not included.

▼ split sites of intron/exon. E2-E6: exon 2- 6. Corresponding species names are listed in Table S2.

FIG. S9. Neighbor-joining phylogenetic tree of representative representative class C MADS-box gene proteins generated with 1000 bootstrap replicates

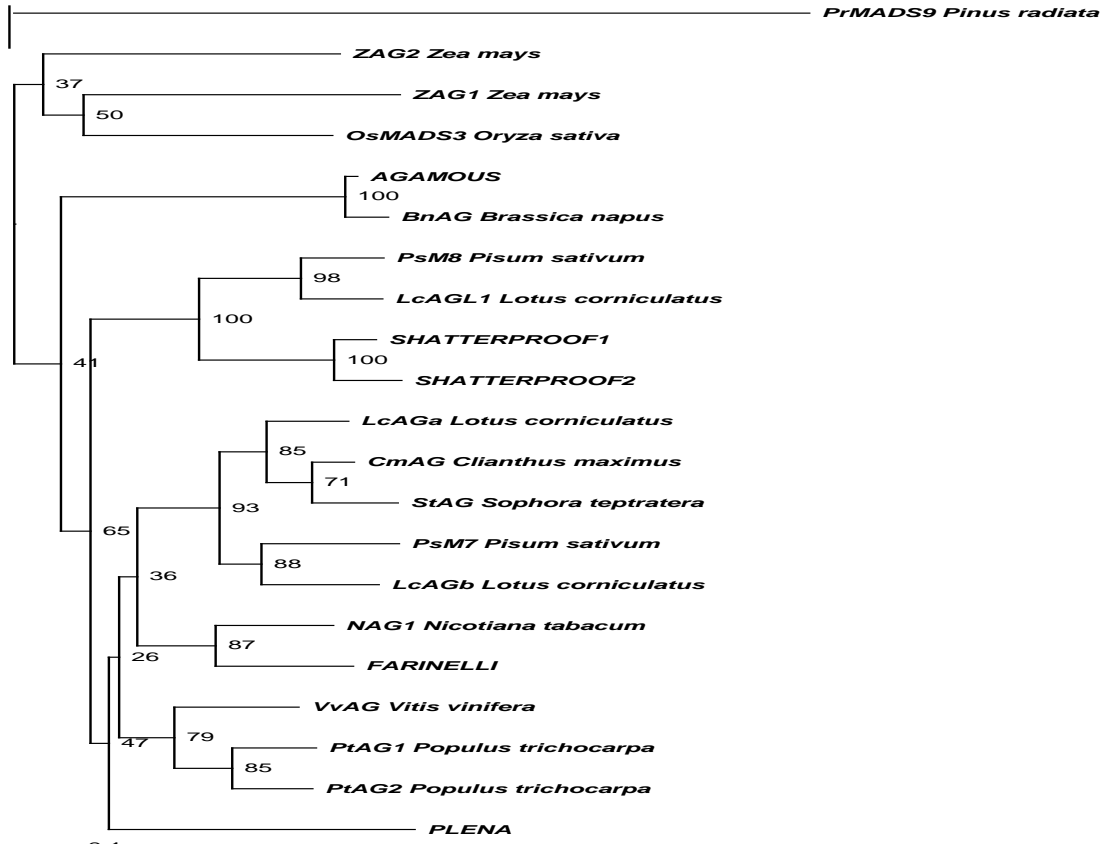

Species names and NCBI accession numbers are listed in Table S2.
